# Supplementary material
Source: PubMed Central journal article supplement (PMC55823)
Supplement: nar_29_15_3219__1.pdf [file nar_29_15_3219__1.pdf]

## SUPPLEMENTARY MATERIAL

## Parameterization method

An iterative process of refinement was used to optimize parameters for the phosphoramidate backbone while keeping them compatible with regular DNA parameters using previously established protocols for the CHARMM force field (1,2). The interaction parameters optimized were the partial charges on the new modified atoms and adjacent atoms. The partial atomic charges were optimized to reproduce the *ab initio* water interaction energies and distances. *Ab initio* goal data for these interactions were obtained by HF/6-31G\* calculations scaled appropriately (3) and performed with compound **A** interacting with one water molecule at a time in different orientations. Water interactions were calculated using the TIP3P water model implemented in CHARMM (4,5). A fixed HF/6-31G\* optimized *gauche/trans* geometry of compound **A** and a fixed water TIP3P geometry was used for these water interaction calculations. The different interaction geometries studied are shown in Figure S1 and the water interaction energies and distances are shown in Table S1.

Bond, angle and dihedral force constants were optimized using frequency calculations to reproduce the *ab initio* vibrational spectra calculated at the MP2/6-31G\* level. Analysis of the normal modes of compound **A** was done using the MOLVIB program (6) within CHARMM. Bond and angle equilibrium values were also optimized to reproduce *ab initio* optimized geometries (Table S2). The behavior of the dihedral parameters has the greatest influence on conformational properties of the molecules. The dihedral parameters for the dihedrals near the N3'-H substitution ( $\alpha$ ,  $\epsilon$  and  $z$ ) were therefore carefully optimized to reproduce both the *ab initio* vibrational frequencies and the *ab initio* dihedral surfaces. Parameters

developed for the smaller model compounds were transferred to the larger model compounds and the additional new parameters specific to these compounds were optimized by similar procedures. A detailed description of our nucleic acid parameterization philosophy and its motivations are described elsewhere (1–3,7). The final parameters used in the present study are shown in Table S4.

## REFERENCES

- Foloppe, N. and MacKerell, A.D. Jr (2000) All-atom empirical force field for nucleic acids: 1) Parameter optimization based on small molecule and condensed phase macromolecular target data. *J. Comp. Chem.*, **21**, 86–104.
- MacKerell, A.D. Jr and Banavali, N. (2000) All-atom empirical force field for nucleic acids: 2) Application to molecular dynamics simulations of DNA and RNA in solution. *J. Comp. Chem.*, **21**, 105–120.
- MacKerell, A.D. Jr, Wiórkiewicz-Kuczera, J. and Karplus, M. (1995) An all-atom empirical energy function for the simulation of nucleic acids. *J. Am. Chem. Soc.*, **117**, 11946–11975.
- Jorgensen, W.L., Chandrasekhar, J., Madura, J.D., Impey, R.W. and Klein, M.L. (1983) Comparison of simple potential functions for simulating liquid water. *J. Chem. Phys.*, **79**, 926–935.
- Reiher, W.E. (1985) Theoretical studies of hydrogen bonding, PhD thesis, Harvard University, Cambridge, MA.
- Kuczera, K., Wiórkiewicz, J.K. and Karplus, M. (1993) *CHARMM*. Harvard University, Cambridge, MA.
- MacKerell, J.A.D., Bashford, D., Bellott, M., Dunbrack, R.L. Jr, Evanseck, J., Field, M.J., Fischer, S., Gao, J., Guo, H., Ha, S., Joseph, D., Kuchnir, L., Kuczera, K., Lau, F.T.K., Mattos, C., Michnick, S., Ngo, T., Nguyen, D.T., Prodhom, B., Reiher, I.W.E., Roux, B., Schlenkrich, M., Smith, J., Stote, R., Straub, J., Watanabe, M., Wiórkiewicz-Kuczera, J., Yin, D. and Karplus, M. (1998) All-atom empirical potential for molecular modeling and dynamics studies of proteins. *J. Phys. Chem. B*, **102**, 3586–3616.
- Florián, J. and Johnson, B.G. (1994) Comparison and scaling of Hartree-Fock and density functional harmonic force fields. I. Formamide monomer. *J. Phys. Chem.*, **98**, 3681–3687.

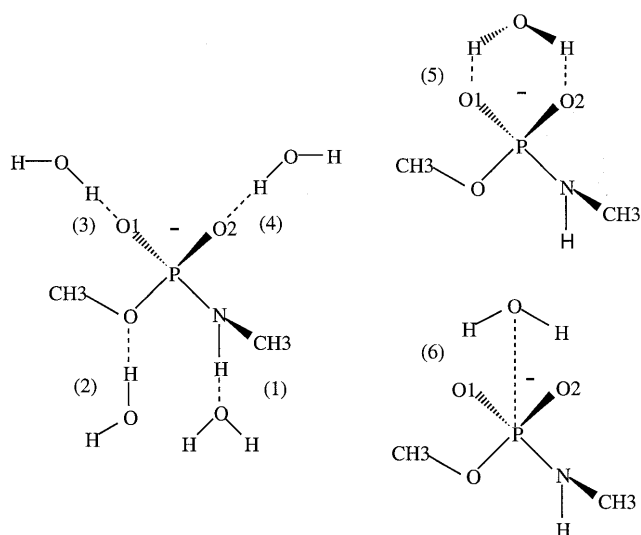

**Figure S1.** Water interaction geometries studied to develop partial atomic charges in model compound **A** in the *gauche/trans* orientation. Distances or hydrogen bonds along which interactions were optimized are indicated by dashed lines. In interaction 5, the plane of the water molecule is parallel to the O1–P–O2 plane. In interaction 6, the plane of the water molecule is perpendicular to the O1–P–O2 plane.

Continued

**Table S1.** Empirical and *ab initio* water interaction energies and distances for compound **A** in *gauche/trans* orientation

| Interaction   | <i>Ab initio</i> |                  | Empirical        |                  | Differences |       |
|---------------|------------------|------------------|------------------|------------------|-------------|-------|
|               | E <sub>min</sub> | R <sub>min</sub> | E <sub>min</sub> | R <sub>min</sub> | ΔE          | ΔR    |
| (1) N-H...OHH | 2.82             | 2.44             | 2.69             | 2.05             | -0.13       | -0.39 |
| (2) O...HOH   | -6.73            | 2.04             | -7.35            | 2.05             | -0.62       | 0.01  |
| (3) O1...HOH  | -14.01           | 1.84             | -13.96           | 1.65             | 0.05        | -0.19 |
| (4) O2...HOH  | -14.05           | 1.84             | -13.96           | 1.65             | 0.09        | -0.19 |
| (5) P0...OHH  | -17.29           | 3.38             | -17.03           | 3.27             | 0.26        | -0.11 |
| (6) P90...OHH | -10.58           | 3.74             | -11.07           | 3.59             | -0.49       | -0.15 |

Energies are in kcal/mol and distances are in Å. Interaction 5 has the O–P–O plane co-planar with the plane of the water molecule while in interaction 6 the planes are perpendicular. *Ab initio* calculations done at the HF/6-31G\* level of theory.

**Table S2.** Comparison of the minimized *ab initio* and CHARMM geometries for model compound **A** in the *gauche/trans* conformation

|                     | CHARMM | <i>Ab initio</i> | Difference |
|---------------------|--------|------------------|------------|
| Bonds (in Å)        |        |                  |            |
| 1) N-C              | 1.457  | 1.457            | 0.000      |
| 2) N-P              | 1.715  | 1.717            | 0.002      |
| 3) N-H              | 1.017  | 1.017            | 0.000      |
| Angles (in degrees) |        |                  |            |
| 4) H-N-C            | 114.2  | 112.2            | 2.1        |
| 5) N-C-H1           | 110.5  | 113.9            | -3.5       |
| 6) N-C-H2           | 111.7  | 107.2            | 4.5        |
| 7) N-C-H3           | 111.1  | 110.4            | 0.7        |
| 8) C-N-P            | 117.1  | 116.5            | 0.6        |
| 9) H-N-P            | 110.2  | 109.4            | 0.8        |
| 10) N-P-O           | 97.7   | 97.2             | 0.6        |
| 11) N-P-O1          | 109.4  | 109.2            | 0.2        |
| 12) N-P-O2          | 107.3  | 107.8            | -0.5       |

*Ab initio* calculations done at the MP2/6-31+G\* level.

(Opposite) Stretching modes are represented by an *s* followed by the atoms in the bond stretch, for example, sN-H is the stretching mode of the hydrogen attached to the N atom. Angle deformations are represented by *d* and a descriptor, as in dNPO, which is the N–P–O angle deformation. Wagging is represented by *wag* and a descriptor, as in wagNH, which is the wagging mode of the hydrogen attached to the nitrogen. Other abbreviations: *tor*, dihedral torsion; *r*, rocking; *s*, symmetrical at the end; *as*, asymmetrical at the end. *Ab initio* frequencies, at the MP2/6-31G\* level, have been scaled by 0.94 as previously described (8).

**Table S3.** Vibrational frequency assignments and relative contributions of the assignments to the frequency for the *gauche/trans* conformation of compound **A**

|    | <i>Ab initio</i> |         |              | CHARMM    |         |              |
|----|------------------|---------|--------------|-----------|---------|--------------|
|    | Frequency        | Mode    | Contribution | Frequency | Mode    | Contribution |
| 1  | 39               | torNPOC | 92           | 75        | torNPOC | 93           |
| 2  | 103              | torOPNC | 82           | 110       | torOPNC | 84           |
| 3  | 140              | torPOCH | 79           | 148       | torPOCH | 84           |
| 4  | 162              | dNPO    | 28           | 168       | dNPO    | 49           |
|    |                  | torPNCH | 25           |           | dPOC    | 20           |
|    |                  |         |              |           | torPNCH | 17           |
| 5  | 205              | torPNCH | 61           | 210       | torPNCH | 70           |
|    |                  | dPNC    | 17           |           |         |              |
| 6  | 242              | dPOC    | 50           | 295       | dPOC    | 51           |
| 7  | 335              | twPO2   | 31           | 369       | dPNC    | 38           |
|    |                  | dNPO    | 30           |           | twPO2   | 24           |
|    |                  |         |              |           | wPO2    | 17           |
| 8  | 360              | twPO2   | 39           | 424       | twPO2   | 28           |
|    |                  | dPNC    | 20           |           | rPO2    | 27           |
|    |                  |         |              |           | sP-N    | 26           |
| 9  | 435              | wPO2    | 48           | 465       | wPO2    | 39           |
|    |                  | dOPO    | 28           |           | twPO2   | 33           |
| 10 | 479              | rPO2    | 34           | 499       | dOPO    | 58           |
|    |                  | dOPO    | 24           |           |         |              |
| 11 | 508              | rPO2    | 23           | 566       | wagNH   | 76           |
| 12 | 642              | sP-O    | 38           | 636       | dPNC    | 36           |
|    |                  | wagNH   | 19           |           | dOPO    | 19           |
| 13 | 693              | sP-O    | 40           | 719       | sP-O    | 23           |
|    |                  | wagNH   | 19           |           | sP-N    | 17           |
|    |                  | rPO2    | 18           |           | dPNC    | 16           |
|    |                  | sP-N    | 15           |           |         |              |
| 14 | 783              | sP-N    | 38           | 810       | sP-O    | 30           |
|    |                  | wagNH   | 25           |           | sP-N    | 27           |
|    |                  |         |              |           | rPO2    | 21           |
| 15 | 1063             | sP=O    | 64           | 1012      | sN-C    | 36           |
| 16 | 1084             | sO-C    | 26           | 1046      | rch3'   | 15           |
|    |                  | dNH     | 18           |           | sO-C    | 58           |
| 17 |                  | rch3'   | 18           |           |         |              |
|    |                  | sN-C    | 17           |           |         |              |
| 18 | 1091             | sO-C    | 57           | 1053      | rch3    | 73           |
|    |                  | sP=O    | 25           |           |         |              |
| 19 | 1131             | sN-C    | 52           | 1093      | rch3'   | 45           |
|    |                  | rch3'   | 35           |           | sN-C    | 19           |
| 20 | 1149             | rch3    | 80           | 1109      | sP=O    | 55           |
| 21 | 1168             | rch3'   | 97           | 1141      | rch3'   | 62           |
| 22 | 1188             | rch3    | 92           | 1144      | rch3    | 54           |
| 23 | 1275             | sP=O    | 90           | 1261      | sP=O    | 60           |
|    |                  |         |              |           | dNH     | 28           |
| 24 | 1400             | dNH     | 70           | 1338      | dNH     | 52           |
|    |                  |         |              |           | sP=O    | 28           |
| 25 | 1445             | dch3s   | 110          | 1412      | dch3as  | 90           |
| 26 | 1461             | dch3s   | 105          | 1431      | dch3as' | 60           |
|    |                  |         |              |           | dch3as  | 20           |
|    |                  |         |              |           | rch3    | 19           |
| 27 | 1504             | dch3as  | 65           | 1434      | dch3as' | 83           |
|    |                  | dch3as' | 33           |           |         |              |
| 28 | 1511             | dch3as' | 99           | 1463      | dch3as  | 58           |
|    |                  |         |              |           | rch3'   | 25           |
|    |                  |         |              |           | dch3as' | 20           |
| 29 | 1534             | dch3as  | 84           | 1561      | dch3s   | 76           |
|    |                  |         |              |           | sN-C    | 19           |
| 30 | 1535             | dch3as' | 65           | 1610      | dch3s   | 88           |
|    |                  | dch3as  | 33           |           |         |              |
| 31 | 2958             | sCH3s   | 87           | 2854      | sCH3s   | 100          |
| 32 | 2967             | sCH3s   | 98           | 2855      | sCH3s   | 100          |
| 33 | 3017             | sCH3as  | 72           | 2913      | sCH3as' | 52           |
|    |                  | sCH3as' | 25           |           | sCH3as  | 48           |
| 34 | 3042             | sCH3as' | 60           | 2914      | sCH3as  | 98           |
|    |                  | sCH3as  | 38           |           |         |              |
| 35 | 3061             | sCH3as  | 62           | 2914      | sCH3as  | 53           |
|    |                  | sCH3as' | 38           |           | sCH3as' | 46           |
| 36 | 3108             | sCH3as' | 72           | 2918      | sCH3as' | 100          |
|    |                  | sCH3as  | 18           |           |         |              |
| 37 | 3467             | sN-H    | 100          | 3370      | sN-H    | 100          |

**Table S4.** CHARMM parameters developed in this study unique to phosphoramidate**Table S4A.** Bond parameters

| Bond type | $K_b$ | $b_0$ |
|-----------|-------|-------|
| NN1 CN7   | 360.0 | 1.462 |
| NN1 CN8B  | 360.0 | 1.462 |
| NN1 P     | 180.0 | 1.792 |
| NN1 HN2   | 432.5 | 1.025 |

Equilibrium bond lengths ( $b_0$ ) in Å and force constants ( $K_b$ ) in kcal/mol.Å

**Table S4B.** Angle parameters

| Angle type    | $K_\theta$ | $\theta_0$ | $K_{UB}$ | $S_0$ |
|---------------|------------|------------|----------|-------|
| HN2 NN1 CN8B  | 35.0       | 109.0      |          |       |
| HN2 NN1 P     | 30.0       | 123.6      | 40.0     | 2.35  |
| HN2 NN1 CN7   | 35.0       | 109.0      |          |       |
| CN7 NN1 P     | 110.0      | 118.3      | 35.0     | 2.33  |
| CN8B NN1 P    | 110.0      | 118.3      | 35.0     | 2.33  |
| NN1 P ON2     | 60.0       | 103.2      |          |       |
| NN1 P ON3     | 140.0      | 110.6      |          |       |
| NN1 P ON4     | 60.0       | 103.2      |          |       |
| NN1 CN8B CN7B | 43.7       | 110.0      |          |       |
| NN1 CN7 CN7   | 43.7       | 110.0      |          |       |
| NN1 CN7 CN7B  | 43.7       | 110.0      |          |       |
| NN1 CN7 CN8   | 43.7       | 110.0      |          |       |
| NN1 CN7 HN7   | 48.0       | 110.0      |          |       |
| NN1 CN8B CN7  | 43.7       | 110.0      |          |       |
| NN1 CN8B HN8  | 48.0       | 110.0      |          |       |

Equilibrium bond angles ( $\theta_0$ ) are given in degrees and force constants ( $K_\theta$ ,  $K_{UB}$ ) are given in kcal/mol.Å.  $S_0$  denotes the Urey–Bradley distance in Å.

**Table S4C.** Dihedral parameters

| Dihedral          | $K_\phi$ | n | $\phi$ |
|-------------------|----------|---|--------|
| P NN1 CN7 HN7     | 0.15     | 3 | 0.0    |
| P NN1 CN8B HN8    | 0.15     | 3 | 0.0    |
| NN1 P ON2 CN7     | 0.35     | 1 | 0.0    |
| NN1 P ON2 CN7     | 0.35     | 2 | 50.0   |
| NN1 P ON2 CN7     | 0.35     | 3 | 0.0    |
| NN1 P ON2 CN8B    | 0.35     | 1 | 0.0    |
| NN1 P ON2 CN8B    | 0.35     | 2 | 50.0   |
| NN1 P ON2 CN8B    | 0.35     | 3 | 0.0    |
| ON3 P NN1 CN7     | 0.40     | 3 | 0.0    |
| ON3 P NN1 CN7     | 0.80     | 2 | 120.0  |
| ON3 P NN1 CN7     | 0.50     | 4 | 0.0    |
| ON2 P NN1 CN7     | 1.50     | 2 | 0.0    |
| ON3 P NN1 CN8B    | 0.40     | 3 | 0.0    |
| ON3 P NN1 CN8B    | 0.80     | 2 | 120.0  |
| ON3 P NN1 CN8B    | 0.50     | 4 | 0.0    |
| ON2 P NN1 CN8B    | 1.50     | 2 | 0.0    |
| HN2 NN1 CN7 HN7   | 0.01     | 3 | 0.0    |
| HN2 NN1 CN8B HN8  | 0.01     | 3 | 0.0    |
| HN2 NN1 P ON2     | 0.05     | 3 | 0.0    |
| HN2 NN1 P ON3     | 0.05     | 3 | 0.0    |
| HN2 NN1 CN7 CN7   | 0.30     | 1 | 0.00   |
| HN2 NN1 CN7 CN7B  | 0.30     | 1 | 0.00   |
| HN2 NN1 CN7 CN8   | 0.30     | 1 | 0.00   |
| HN7 CN7 CN7 NN1   | 0.195    | 3 | 0.0    |
| HN7 CN7B CN7 NN1  | 0.195    | 3 | 0.0    |
| HN8 CN8 CN7 NN1   | 0.195    | 3 | 0.0    |
| ON6B CN7 CN7 NN1  | 0.20     | 3 | 0.0    |
| ON6 CN7 CN7 NN1   | 0.20     | 3 | 0.0    |
| HN2 NN1 P ON4     | 0.05     | 3 | 0.0    |
| P NN1 CN7 CN7     | 2.4      | 1 | 180.0  |
| P NN1 CN7 CN7     | 0.6      | 3 | 180.0  |
| P NN1 CN7 CN7B    | 2.5      | 1 | 180.0  |
| P NN1 CN7 CN8     | 2.5      | 1 | 180.0  |
| NN1 CN7 CN7B CN7B | 1.5      | 1 | 180.0  |
| NN1 CN7 CN7B CN7B | 1.5      | 2 | 0.0    |
| NN1 CN7 CN7B CN7B | 1.1      | 3 | 180.0  |
| NN1 CN7 CN8 CN7B  | 1.1      | 1 | 180.0  |
| NN1 CN7 CN8 CN7B  | 1.1      | 2 | 0.0    |
| NN1 CN7 CN8 CN7B  | 0.5      | 3 | 180.0  |
| NN1 CN7 CN7 CN8B  | 0.5      | 2 | 180.0  |
| P NN1 CN8B CN7    | 0.20     | 1 | 120.0  |
| CN7 CN7 CN8B NN1  | 0.20     | 4 | 180.0  |
| CN7 CN7 CN8B NN1  | 0.80     | 3 | 180.0  |
| CN7 CN7 CN8B NN1  | 0.40     | 2 | 0.0    |
| CN7 CN7 CN8B NN1  | 2.50     | 1 | 180.0  |
| HN7 CN7 CN8B NN1  | 0.195    | 3 | 0.0    |
| HN2 NN1 CN8B CN7  | 0.26     | 1 | 0.0    |
| ON6B CN7 CN8B NN1 | 3.4      | 1 | 180.0  |
| ON6 CN7 CN8B NN1  | 3.4      | 1 | 180.0  |
| CN7 CN7 ON5 HN7   | 0.5      | 3 | 0.0    |
| CN7 CN7 ON5 HN7   | 1.0      | 1 | 0.0    |
| CN8B CN7 ON5 HN7  | 0.5      | 3 | 0.0    |
| CN8B CN7 ON5 HN7  | 1.0      | 1 | 0.0    |
| HN7 CN7 ON5 HN7   | 0.1      | 3 | 0.0    |
| ON5 CN7 CN8B NN1  | 3.4      | 1 | 180.0  |
| HN8 CN8B CN7 ON5  | 0.195    | 1 | 0.0    |

Force constant ( $K_\phi$ ) is given in kcal/mol.radian,  $n$  is periodicity,  $\phi$  is the phase angle.

**Table S4D.** Improper dihedral parameters

| Improper dihedral | $K_\omega$ | $\omega_0$ |
|-------------------|------------|------------|
| CN7 P NN1 HN2     | 1.3        | 180.0      |
| CN8B P NN1 HN2    | 1.3        | 180.0      |

Improper dihedral angle ( $\omega_0$ ) in degrees and force constant ( $K_\omega$ ) in kcal/mol.Å.
